# Supplementary material for: Direct Oral FXa Inhibitors Binding to Human Serum Albumin: Spectroscopic, Calorimetric, and Computational Studies
Source: MDPI journal article supplement (doi:10.3390/ijms24054900), 2023-03-03
Supplement: s1 [file s1]

## SUPPLEMENTARY MATERIAL

### Direct Oral FXa Inhibitors Binding to Human Serum Albumin: Spectroscopic, Calorimetric, and Computational Studies

Nory Mariño-Ocampo <sup>1,∞</sup>, Diego F. Rodríguez <sup>1,∞</sup>, Daniel Guerra Díaz <sup>1</sup>, Daniel Zúñiga-Núñez <sup>1</sup>, Yorley Duarte <sup>2</sup>, Denis Fuentealba<sup>1,\*</sup> and Flavia C. Zacconi <sup>1,3,4,5\*</sup>

1 Escuela de Química, Facultad de Química y de Farmacia, Pontificia Universidad Católica de Chile, Santiago 7820436, Chile.

2 Center for Bioinformatics and Integrative Biology, Facultad de Ciencias de la Vida, Universidad Andrés Bello, Santiago 8370035, Chile.

3 Institute for Biological and Medical Engineering, Schools of Engineering, Medicine and Biological Sciences, Pontificia Universidad Católica de Chile, Santiago 7820436, Chile.

4 Centro de Investigaciones en Nanotecnología y Materiales Avanzados, CIEN-UC, Pontificia Universidad Católica de Chile, Santiago 7820436, Chile.

5 Center for Nanomedicine, Diagnostic & Drug Development (ND3), Universidad de Talca, Talca 3460000, Chile.

<sup>∞</sup> Contributed equally to this work: Nory Mariño-Ocampo and Diego F. Rodríguez.

\* Correspondence: dlfuente@uc.cl (D.F.), fzacconi@uc.cl (F.C.Z.)

#### List of content

- Figure S1.** Fluorescence quenching spectra of HSA in the presence of edoxaban tosylate at 298 K. Samples measurements were recorded in 0.10 M Tris-HCl buffer pH 7.4 and 0.10 M NaCl,  $\lambda_{\text{ex}}=295$  nm, and,  $\lambda_{\text{em}}=350$  nm.....3S
- Figure S2.** Fluorescence quenching spectra of HSA in the presence of betrixaban maleate at 298 K. Samples measurements were recorded in 0.10 M Tris-HCl buffer pH 7.4 and 0.10 M NaCl,  $\lambda_{\text{ex}}=295$  nm, and,  $\lambda_{\text{em}}=350$  nm.....3S
- Figure S3.** The Stern-Volmer curves for the quenching of HSA by: a) edoxaban tosylate hydrate and b) betrixaban maleate at 298 K and 310 K.....4S
- Table S1.** Stern-Volmer quenching constant ( $K_{\text{sv}}$ ) of HSA with anticoagulants at two temperatures.....4S

|                                                                                                                                                                                                                                                                                       |    |
|---------------------------------------------------------------------------------------------------------------------------------------------------------------------------------------------------------------------------------------------------------------------------------------|----|
| 5. <b>Table S2.</b> Fluorescence lifetimes and pre-exponential factors of HSA (2 $\mu$ M) with AP at different concentrations (0-12 $\mu$ M) at 293 K in under aerated conditions. The excitation wavelength was 279 nm.....                                                          | 4S |
| 6. <b>Table S3.</b> Fluorescence lifetimes and pre-exponential factors of HSA (2 $\mu$ M) with RV at different concentrations (0-12 $\mu$ M) at 293 K in under aerated conditions. The excitation wavelength was 279 nm.....                                                          | 5S |
| 7. <b>Table S4.</b> Fluorescence lifetimes and pre-exponential factors of HSA (2 $\mu$ M) with ED at different concentrations (0-12 $\mu$ M) at 293 K in under aerated conditions. The excitation wavelength was 279 nm.....                                                          | 5S |
| 8. <b>Table S5.</b> Fluorescence lifetimes and pre-exponential factors of HSA (2 $\mu$ M) with BE at different concentrations (0-12 $\mu$ M) at 293 K in under aerated conditions. The excitation wavelength was 279 nm.....                                                          | 6S |
| 9. <b>Figure S4.</b> ITC data for a titration of 696 $\mu$ M HSA into AP solution (50 $\mu$ M) in phosphate buffer 10 mM, pH = 7.4. <i>Top</i> : Raw data; <i>bottom</i> : Integrated heat effects per injection as a function of molar ratio (fitted to a one site model).....       | 6S |
| 10. <b>Figure S5.</b> ITC data for a titration of 1.58 mM BE maleate into HSA solution (100 $\mu$ M) in phosphate buffer 10 mM, pH = 7.4. <i>Top</i> : Raw data; <i>bottom</i> : Integrated heat effects per injection as a function of molar ratio (fitted to a one site model)..... | 7S |

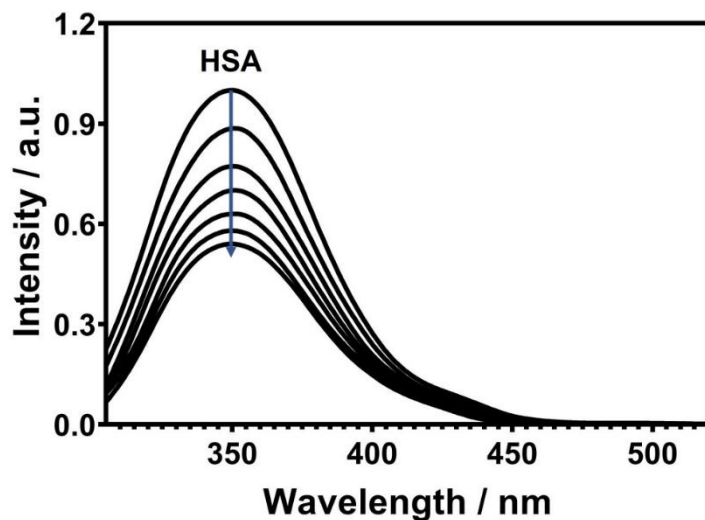

**Figure S1.** Fluorescence quenching spectra of HSA in the presence of edoxaban tosylate at 298 K. Samples measurements were recorded in 0.10 M Tris-HCl buffer pH 7.4 and 0.10 M NaCl,  $\lambda_{\text{ex}}=295$  nm, and  $\lambda_{\text{em}}=350$  nm.

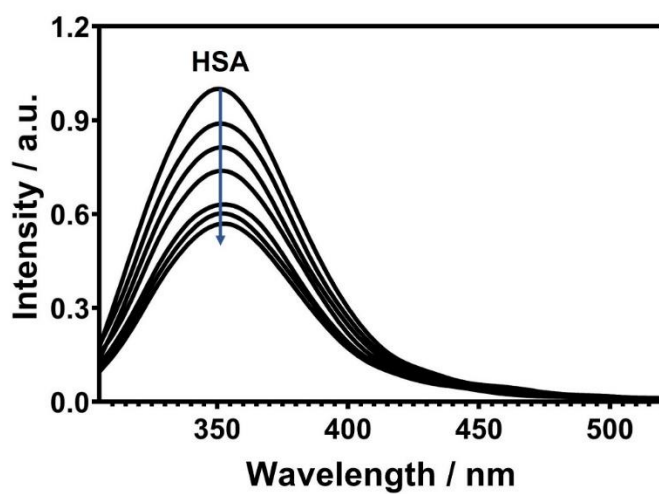

**Figure S2.** Fluorescence quenching spectra of HSA in the presence of betrixaban maleate at 298 K. Samples measurements were recorded in 0.10 M Tris-HCl buffer pH 7.4 and 0.10 M NaCl,  $\lambda_{\text{ex}}=295$  nm, and  $\lambda_{\text{em}}=350$  nm.

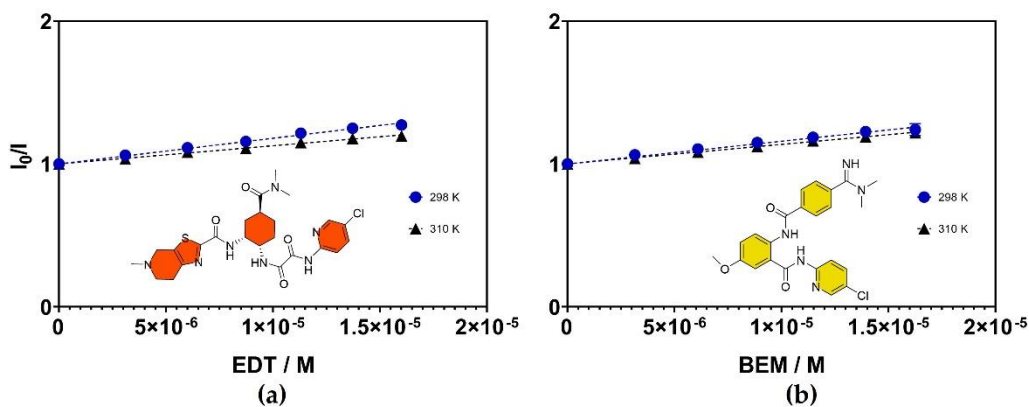

**Figure S3.** The Stern-Volmer curves for the quenching of HSA by: a) edoxaban tosylate hydrate and b) betrixaban maleate at 298 K and 310 K.

**Table S1.** Stern-Volmer quenching constant ( $K_{sv}$ ) of HSA with anticoagulants at two temperatures.

| Anticoagulant | $K_{sv} (\times 10^4 \text{ M}^{-1})$ 298 K | $K_{sv} (\times 10^4 \text{ M}^{-1})$ 310 K |
|---------------|---------------------------------------------|---------------------------------------------|
| EDT           | 1.79±0.03                                   | 1.27±0.02                                   |
| BEM           | 1.59±0.05                                   | 1.36±0.03                                   |

**Table S2.** Fluorescence lifetimes and pre-exponential factors of HSA (2  $\mu\text{M}$ ) with AP at different concentrations (0-12  $\mu\text{M}$ ) at 293 K in under airedated conditions. The excitation wavelength was 279 nm.

| Probe        | $\tau_1$ (ns) | $A_1$ | $\tau_2$ (ns) | $A_2$ | $\chi^2$ | $\langle \tau_F \rangle$ |
|--------------|---------------|-------|---------------|-------|----------|--------------------------|
| HSA          | 3.01          | 0.41  | 6.80          | 0.59  | 1.21     | 5.25                     |
| AP@HSA (1:1) | 3.22          | 0.45  | 7.01          | 0.55  | 1.10     | 5.30                     |
| AP@HSA (1:2) | 2.93          | 0.41  | 6.83          | 0.59  | 1.06     | 5.23                     |
| AP@HSA (1:4) | 2.73          | 0.38  | 6.69          | 0.62  | 1.17     | 5.19                     |
| AP@HSA (1:6) | 2.86          | 0.42  | 6.83          | 0.58  | 1.13     | 5.16                     |

**Table S3.** Fluorescence lifetimes and pre-exponential factors of HSA (2  $\mu\text{M}$ ) with RV at different concentrations (0-12  $\mu\text{M}$ ) at 293 K in under aireated conditions. The excitation wavelength was 279 nm.

| Probe        | $\tau_1$ (ns) | A <sub>1</sub> | $\tau_2$ (ns) | A <sub>2</sub> | $\chi^2$ | $\langle\tau_F\rangle$ |
|--------------|---------------|----------------|---------------|----------------|----------|------------------------|
| HSA          | 3.01          | 0.41           | 6.80          | 0.59           | 1.21     | 5.25                   |
| RV@HSA (1:1) | 3.00          | 0.40           | 6.80          | 0.60           | 1.13     | 5.28                   |
| RV@HSA (1:2) | 2.98          | 0.41           | 6.82          | 0.59           | 1.09     | 5.25                   |
| RV@HSA (1:4) | 2.98          | 0.42           | 6.85          | 0.58           | 0.99     | 5.22                   |
| RV@HSA (1:6) | 2.94          | 0.43           | 6.87          | 0.57           | 1.12     | 5.18                   |

**Table S4.** Fluorescence lifetimes and pre-exponential factors of HSA (2  $\mu\text{M}$ ) with ED at different concentrations (0-12  $\mu\text{M}$ ) at 293 K in under aireated conditions. The excitation wavelength was 279 nm.

| Complex      | $\tau_1$ (ns) | A <sub>1</sub> | $\tau_2$ (ns) | A <sub>2</sub> | $\chi^2$ | $\langle\tau_F\rangle$ |
|--------------|---------------|----------------|---------------|----------------|----------|------------------------|
| HSA          | 3.01          | 0.41           | 6.80          | 0.59           | 1.21     | 5.25                   |
| ED@HSA (1:1) | 2.99          | 0.39           | 6.80          | 0.61           | 1.13     | 5.31                   |
| ED@HSA (1:2) | 2.93          | 0.40           | 6.80          | 0.60           | 1.16     | 5.25                   |
| ED@HSA (1:4) | 2.71          | 0.40           | 6.71          | 0.60           | 1.16     | 5.11                   |
| ED@HSA (1:6) | 2.94          | 0.44           | 6.88          | 0.54           | 1.20     | 5.01                   |

**Table S5.** Fluorescence lifetimes and pre-exponential factors of HSA (2  $\mu\text{M}$ ) with BE at different concentrations (0-12  $\mu\text{M}$ ) at 293 K in under aireated conditions. The excitation wavelength was 279 nm.

| Complex      | $\tau_1$ (ns) | A <sub>1</sub> | $\tau_2$ (ns) | A <sub>2</sub> | $\chi^2$ | $\langle\tau_F\rangle$ |
|--------------|---------------|----------------|---------------|----------------|----------|------------------------|
| HSA          | 3.01          | 0.41           | 6.80          | 0.59           | 1.21     | 5.25                   |
| BE@HSA (1:1) | 3.03          | 0.39           | 6.78          | 0.61           | 1.10     | 5.32                   |
| BE@HSA (1:2) | 2.89          | 0.38           | 6.78          | 0.62           | 1.10     | 5.30                   |
| BE@HSA (1:4) | 2.86          | 0.38           | 6.73          | 0.62           | 1.09     | 5.26                   |
| BE@HSA (1:6) | 2.60          | 0.35           | 6.61          | 0.65           | 1.09     | 5.21                   |

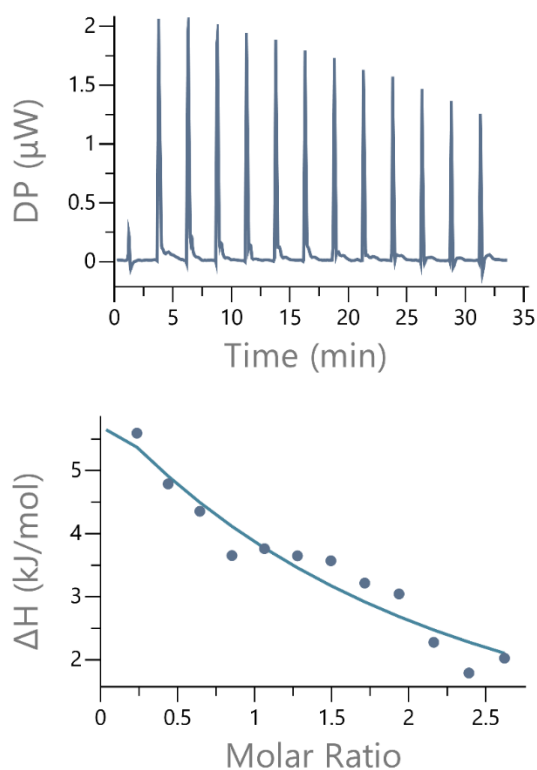

**Figure S4.** ITC data for a titration of 696  $\mu\text{M}$  HSA into AP solution (50  $\mu\text{M}$ ) in phosphate buffer 10 mM, pH = 7.4. *Top:* Raw data; *bottom:* Integrated heat effects per injection as a function of molar ratio (fitted to a one-site model).

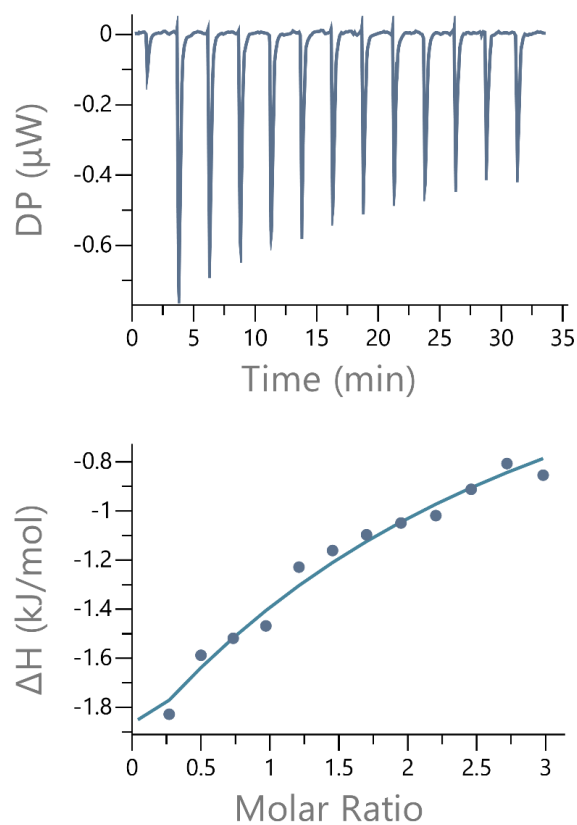

**Figure S5.** ITC data for a titration of 1.58 mM BE maleate into HSA solution (100  $\mu$ M) in phosphate buffer 10 mM, pH = 7.4. *Top*: Raw data; *bottom*: Integrated heat effects per injection as a function of molar ratio (fitted to a one-site model).
